# Supplementary material
Source: Springer Nature journal article supplement (https://www.springermedizin.de/resource/supplementary/12890_2011_309_MOESM6_ESM.pdf/9505074)

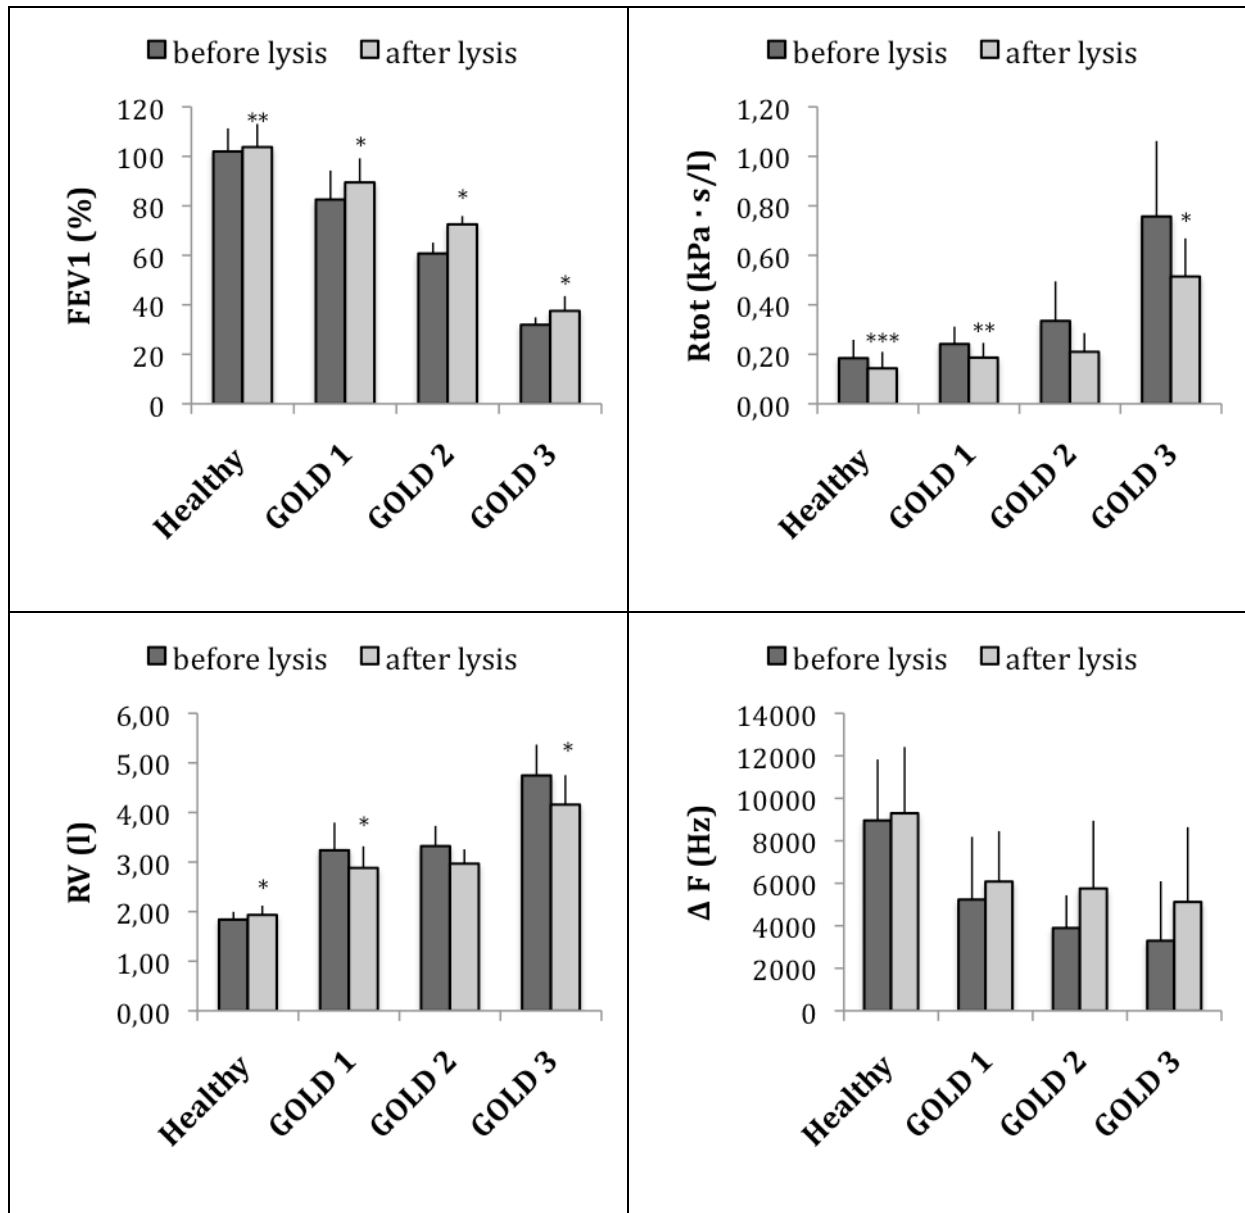

Figure 5

Supplement: MOESM6 [file 9505074]
